# Supplementary material
Source: publisher figshare collection journal article supplement (https://acs.figshare.com/ndownloader/files/3826891)
Supplement: Supplementary file 1 [file 3826891]

## **Supporting information**

### **A New Insight into Catalytic Ozonation with Nanosized Ce-Ti Oxides for NO<sub>x</sub> Removal: Confirmation of Ce-O-Ti for Active Sites**

Jie Ding<sup>a,b</sup>, Qin Zhong<sup>\*a,b</sup>, Shule Zhang<sup>a,b</sup>

<sup>a</sup>*School of Chemical Engineering, Nanjing University of Science and Technology,*

*Nanjing, Jiangsu 210094, PR China*

<sup>b</sup>*Nanjing AIREP Environmental Protection Technology Co., Ltd., Nanjing, Jiangsu*

*210091, PR China*

*Corresponding author: Qin Zhong. Email: zq304@mail.njust.edu.cn. Tel/Fax number:*

*+86 25 84315517.*

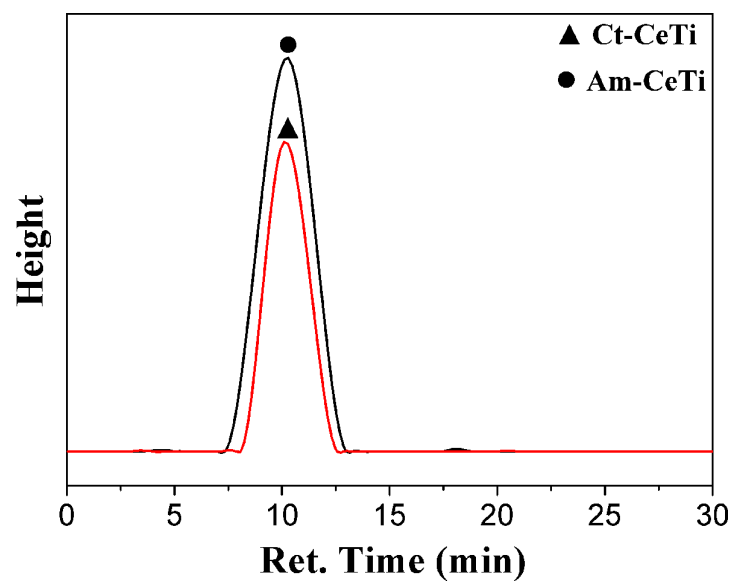

**Figure S1 Ion chromatography of oxidation products for catalytic ozonation over  
Ct-CeTi and Am-CeTi**

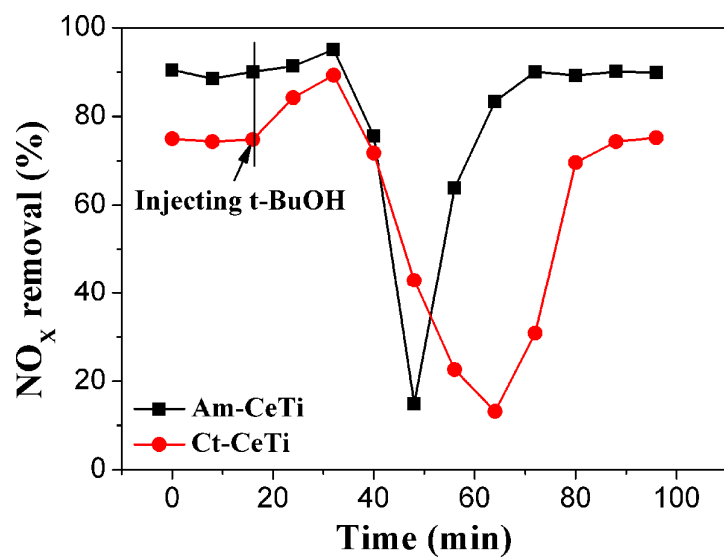

(a)

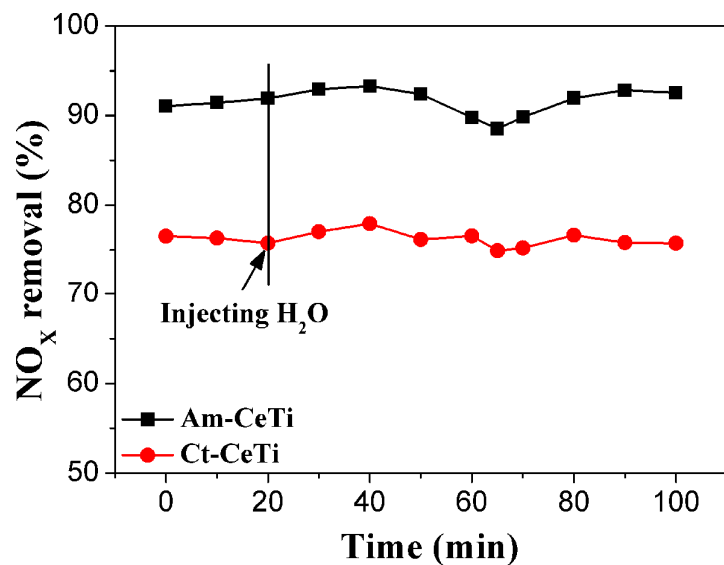

(b)

**Figure S2 Effect of (a) isopropanol and (b) distilled water on NO<sub>x</sub> removal of catalytic ozonation over Ct-CeTi and Am-CeTi**

The experimental conditions are controlled as follows: The total flow of all the reactants were fixed to 400 mL·min<sup>-1</sup>, including 200 mL·min<sup>-1</sup> of the O<sub>3</sub> flow. The initial gas concentrations used in the test were NO<sub>x</sub>: 500 ppm, O<sub>3</sub>: 5.2 mg·L<sup>-1</sup> appeared in different cases. In order to exclude the influence of the volume injecting

in the system. The same volume of  $\text{H}_2\text{O}$  is injecting into the system, and the results are shown in Fig. S3b. It can be observed that the  $\text{NO}_x$  removal has only a slight decrease, indicating that the injecting volume has no apparent influence on  $\text{NO}_x$  removal.

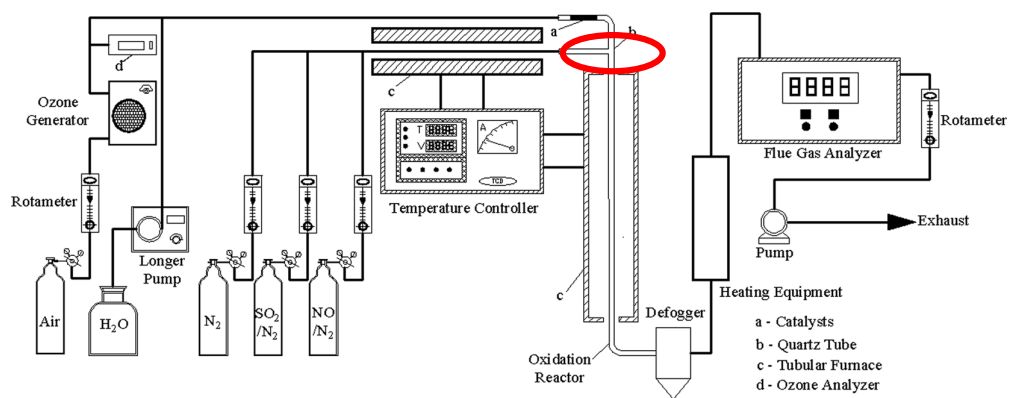

(a)

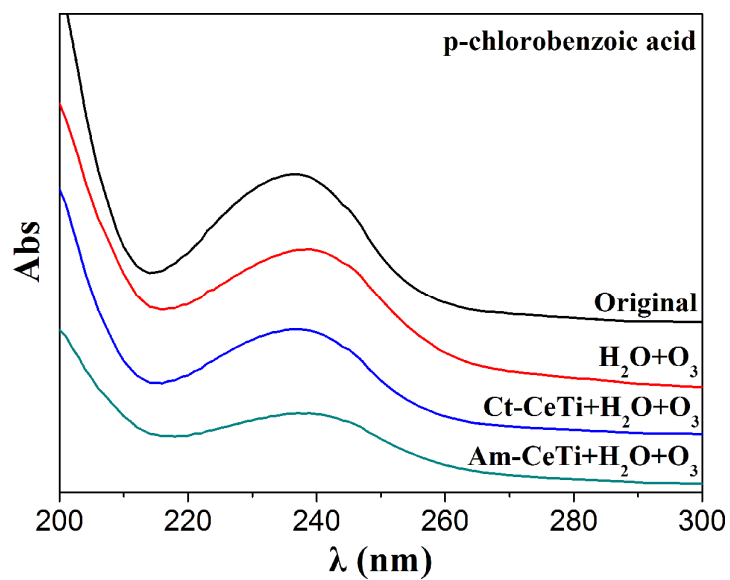

(b)

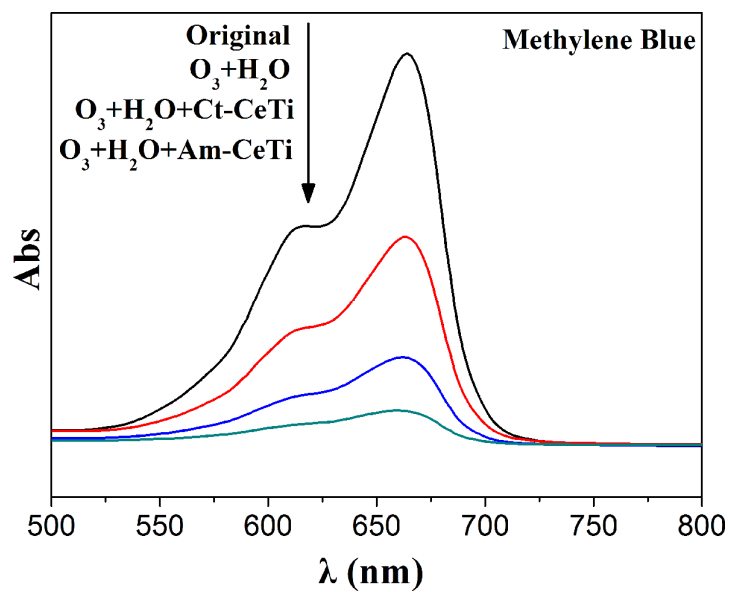

(c)

**Figure S3 The oxidation point of the solutions (a) and UV-Vis spectrophotometry of p-chlorobenzoic acid oxidized by O<sub>3</sub>-water and O<sub>3</sub>-water with CeTi (b) and UV-Vis spectrophotometry of methylene blue in O<sub>3</sub>-water and O<sub>3</sub>-water with CeTi (c)**

The experiments were conducted as follows:

The active mixtures were introduced into p-chlorobenzoic acid or Methylene blue solutions. The solutions were placed in the location as described in red circle in Fig. S4a. If the p-chlorobenzoic acid or Methylene blue is degraded, it can be obtained that the ·OH radicals can be introduced into duct. Because the location of solutions is placed in the same location as the duct.

It has been known that p-chlorobenzoic acid can only be oxidized by ·OH radicals, and can not be oxidized by O<sub>3</sub>. It can be obtained from Fig. S4(b) that the characteristic absorbed peak of p-chlorobenzoic dramatically decreases in Am-CeTi + H<sub>2</sub>O + O<sub>3</sub>, indicating the existence of ·OH radicals and Am-CeTi has much higher ·OH radical concentration. Methylene blue (MB) has a high affinity on ·OH radicals, and easily produces hydroxylation of methylene blue (MB-OH), which is colorless. It can be obtained from Fig. S4(c) that the characteristic absorbed peak of MB decreases much more dramatically in O<sub>3</sub>-water with CeTi catalysts comparing with that in O<sub>3</sub>-water, further indicating the existence of ·OH radicals and Am-CeTi has much higher ·OH radical concentration.

Reaction conditions: O<sub>3</sub> concentration is 5.2 mg·L<sup>-1</sup>, the time is 10 min.

**Table S1 Material balance summary for NO<sub>x</sub>**

| Category                                                | Ct-CeTi | Am-CeTi |
|---------------------------------------------------------|---------|---------|
| Time t, min                                             | 500     | 500     |
| Gas flow Q, mL/min                                      | 400     | 400     |
| Solution volume V <sub>L</sub> , mL                     | 10      | 10      |
| C <sub>in</sub> (NO)                                    | 513     | 509     |
| C <sub>out</sub> (NO)                                   | 48      | 152     |
| NO removal efficiency, %                                | 90.7    | 70.1    |
| C(NO <sub>2</sub> <sup>-</sup> ) actual value, g/L      | 0       | 0       |
| C(NO <sub>3</sub> <sup>-</sup> ) actual value, g/L      | 27.21   | 20.61   |
| C(NO <sub>3</sub> <sup>-</sup> ) calculation value, g/L | 29.5    | 22.6    |
| C(NO <sub>3</sub> <sup>-</sup> ) error, %               | 7.76    | 8.81    |

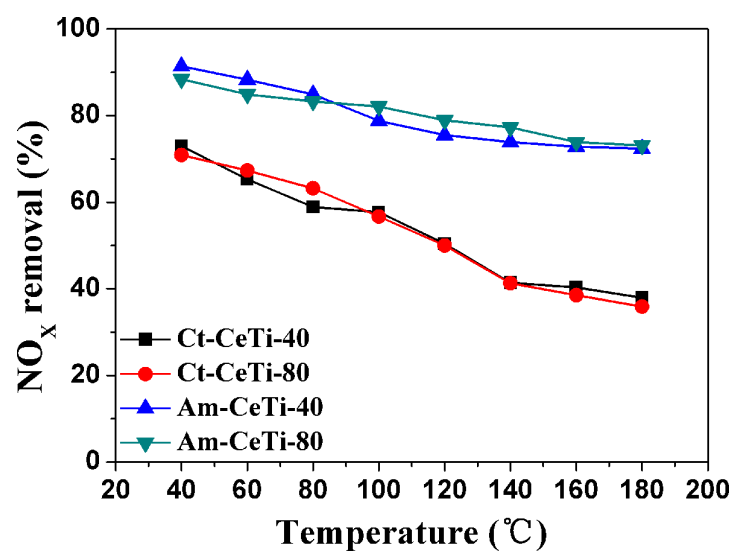

**Figure S4 Catalytic activities of Ct-CeTi and Am-CeTi with the particle size of 40 and 80 mesh.**



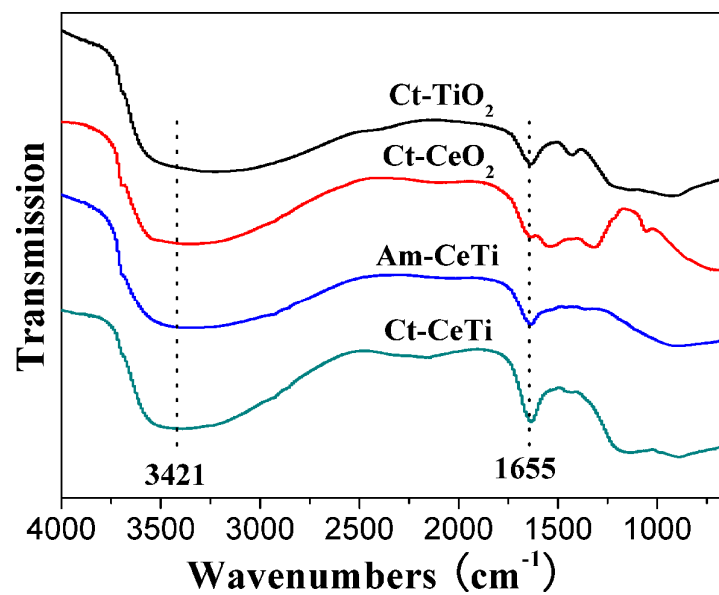

Figure S5 DRIFTS spectra of Ct-TiO<sub>2</sub>, Ct-CeO<sub>2</sub>, Am-CeTi and Ct-CeTi

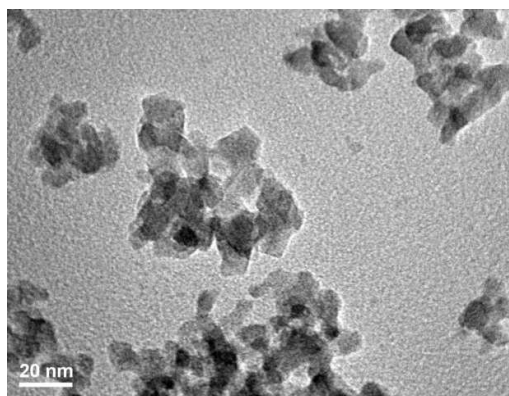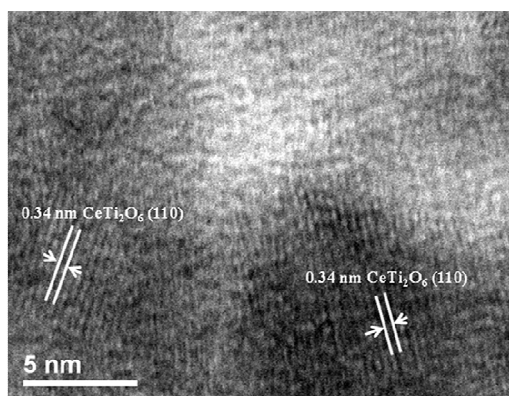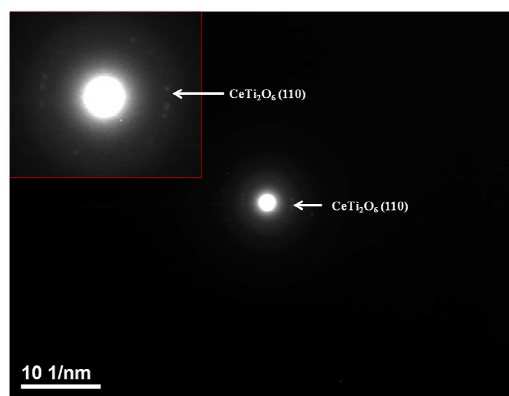

**Figure S6 HRTEM and SAED images of Am-CeTi**

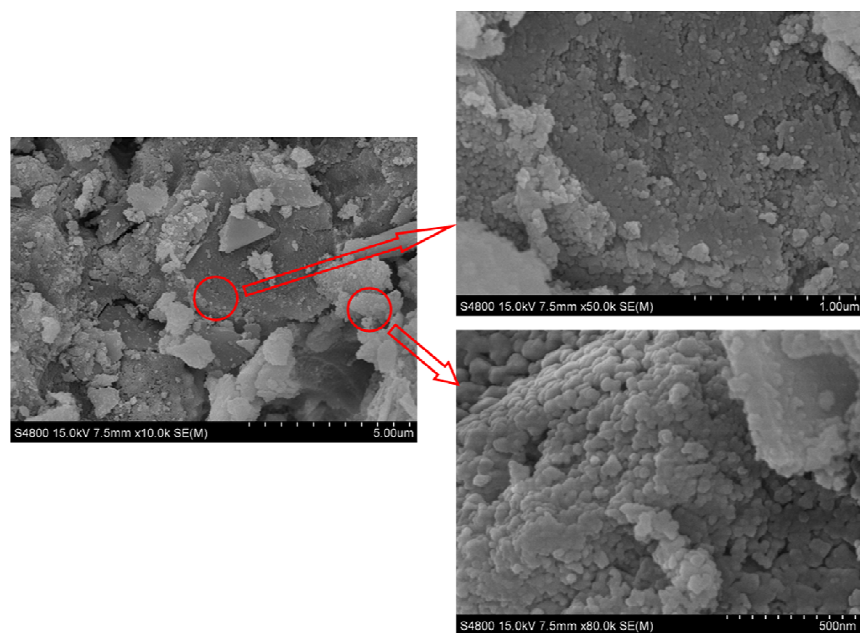

(a)

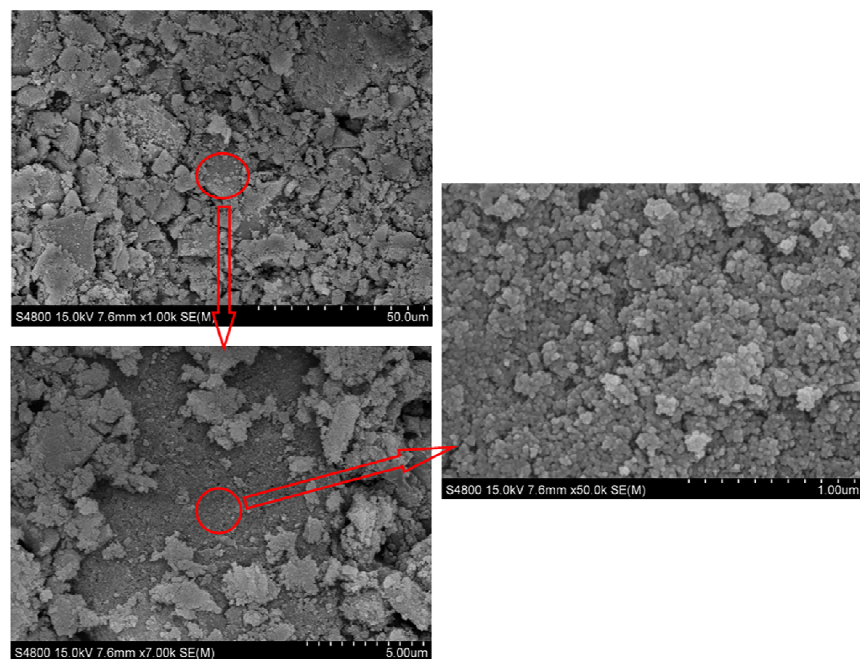

(b)

**Figure S7 SEM micrographs of (a) Ct-CeTi and (b) Am-CeTi**

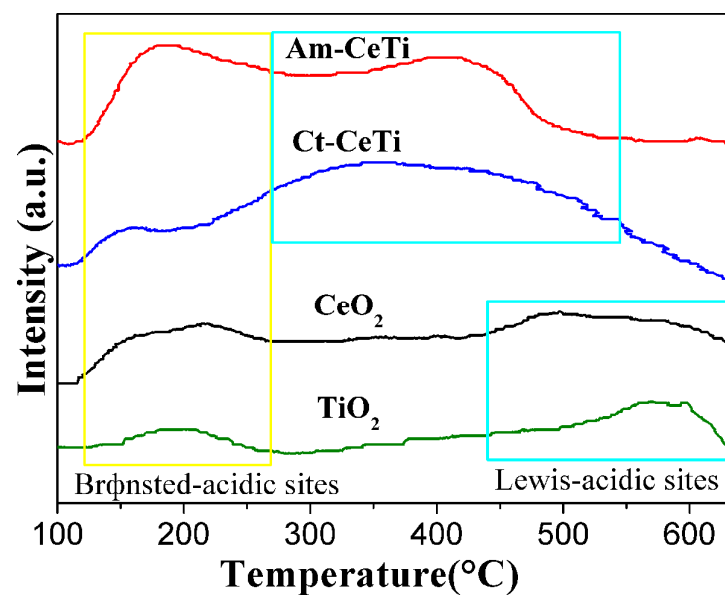

Figure S8 NH<sub>3</sub>-TPD profiles of Am-CeTi, Ct-CeTi, CeO<sub>2</sub> and TiO<sub>2</sub>

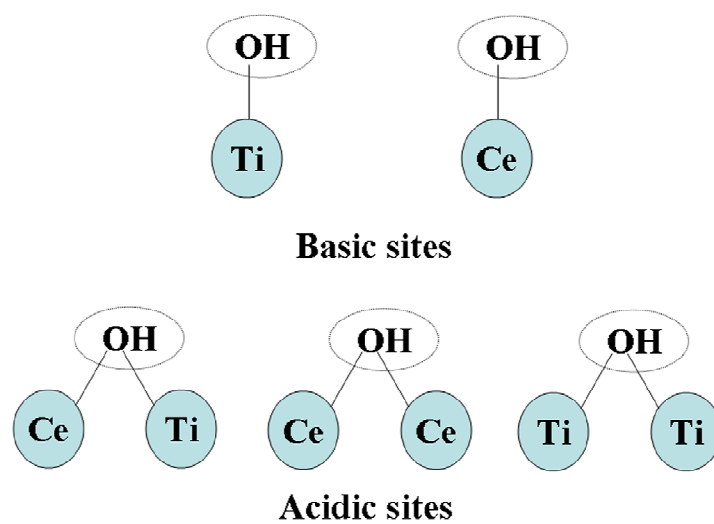

**Figure S9 Acidic and Basic sites of surface hydroxyl groups**

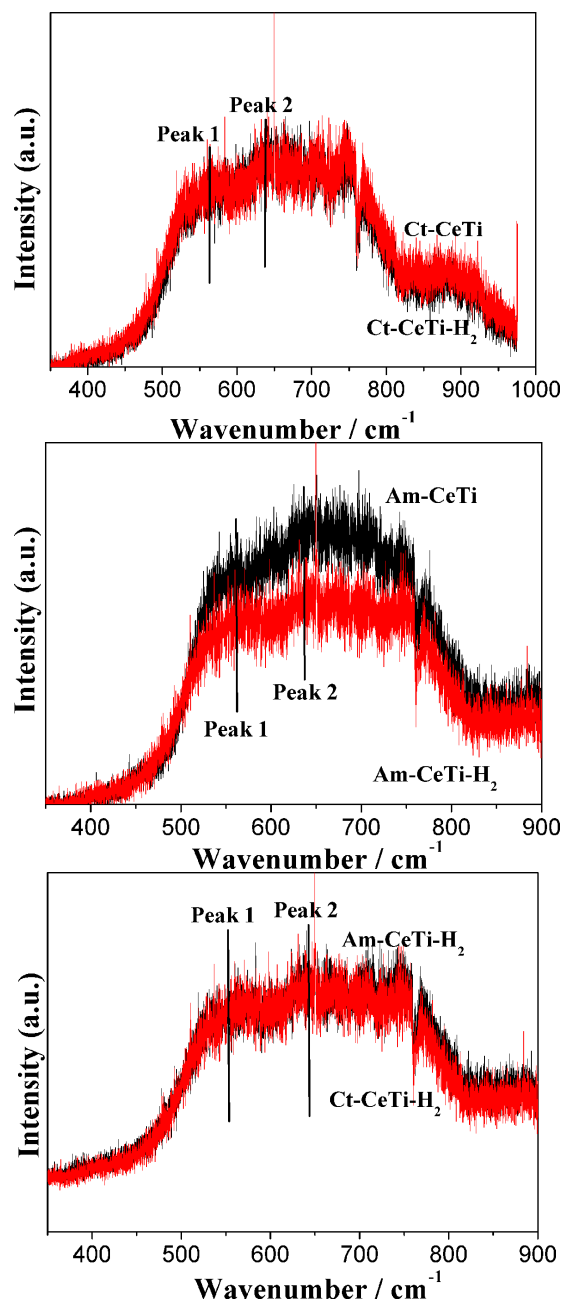

Figure S10 PL spectra of Ct-CeTi, Am-CeTi, Ct-CeTi-H<sub>2</sub> and Am-CeTi-H<sub>2</sub>

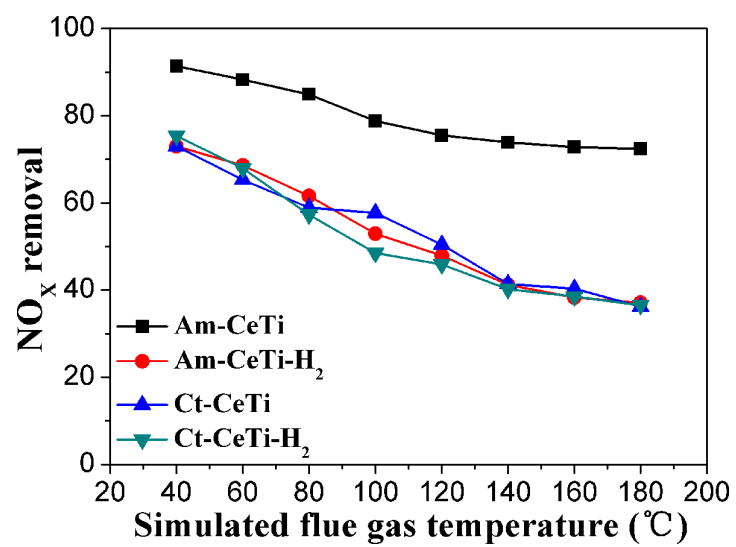

Figure S11 Catalytic activity of Am-CeTi, Am-CeTi-H<sub>2</sub>, Ct-CeTi and Ct-CeTi-H<sub>2</sub>

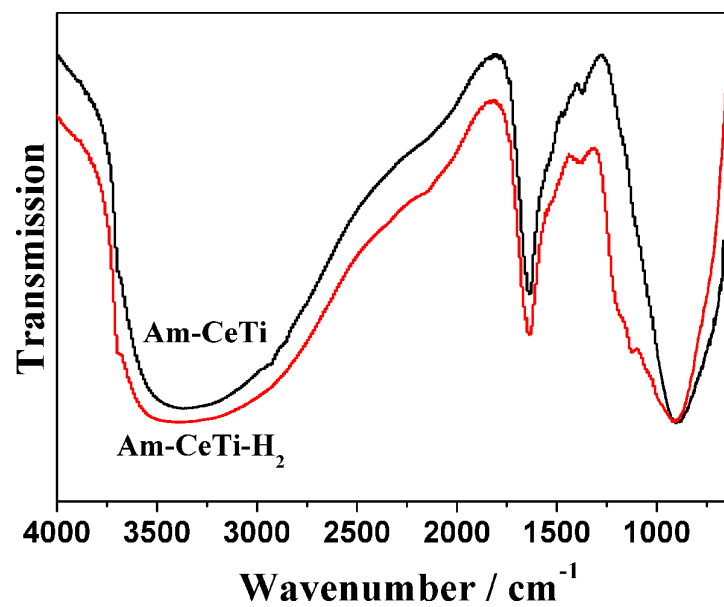

(a)

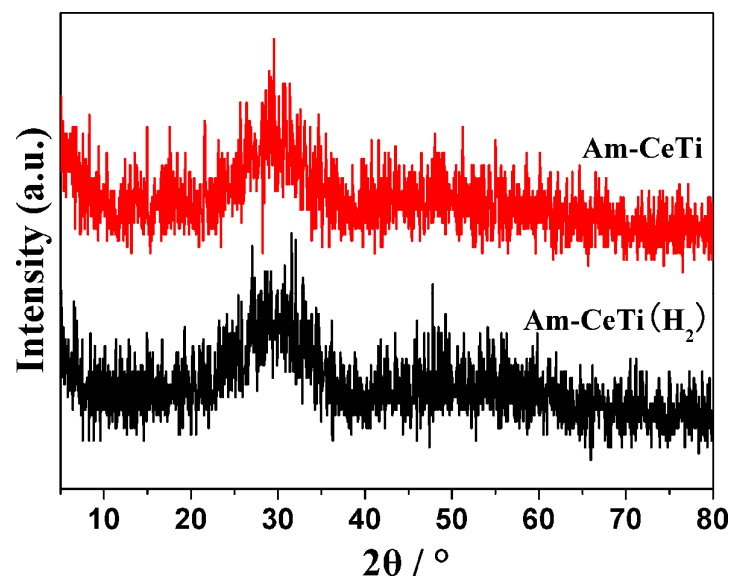

(b)

Figure S12 IR spectra (a) and XRD patterns (b) of Am-CeTi



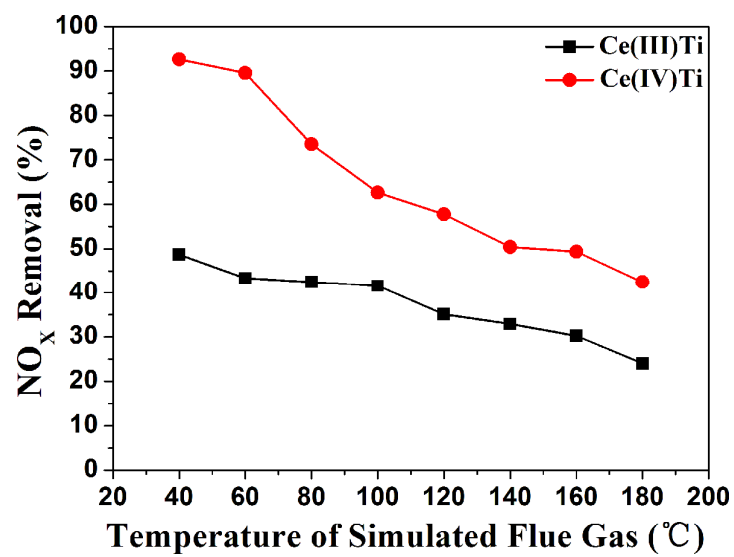

Figure S13 Catalytic activity of Ce(III)Ti and Ce(IV)Ti

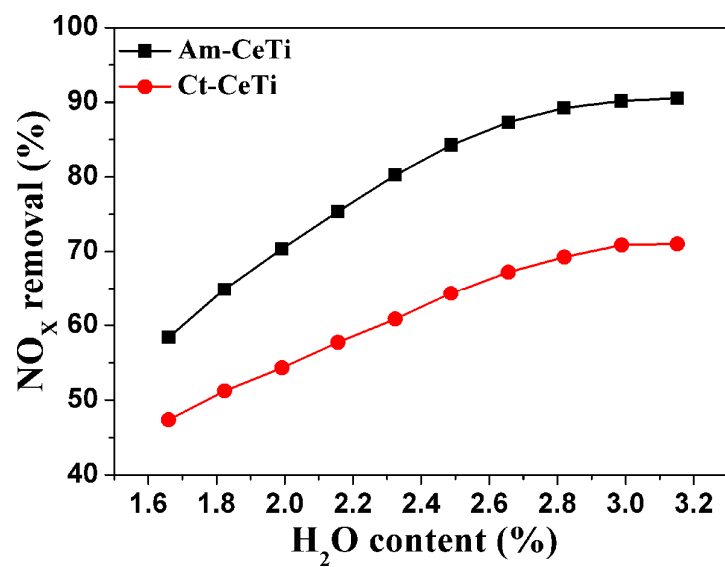

Figure S14 Catalytic activities of Ct-CeTi and Am-CeTi with the increase of H<sub>2</sub>O content
